# Supplementary material for: Altered Protein Function Caused by AMD-associated Variant rs704 Links Vitronectin to Disease Pathology
Source: PubMed Central journal article supplement — Invest Ophthalmol Vis Sci. 2020 Dec 1;61(14):2. doi: 10.1167/iovs.61.14.2 (PMC7718807; doi:10.1167/iovs.61.14.2), 2020-12-01
Supplement: iovs-61-14-2_s001.pdf [file iovs-61-14-2_s001.pdf]

Table S1: Primer sequences, target and application in expression cloning or semiquantitative sequencing. PCRs were conducted with GoTaq® DNA Polymerase (Promega Corporation, Madison, WI, USA).

| Primer Names     | Primer Sequences                | Target            | Application                 |
|------------------|---------------------------------|-------------------|-----------------------------|
| hGusB-RT-F       | GGTTGGAGAGCTCATTGGA             | GUSB              | RT-PCR - housekeeper        |
| hGusB-RT-R       | CACGCAGGTGGTATCAGTCTT           |                   |                             |
| hSOX2-RT-F       | ACACCAATCCCATCCCACT             | SOX2              | RT-PCR - stem cell marker   |
| hSOX2-RT-F       | GCAAACCTTCTGCAAAGCTC            |                   |                             |
| hOCT4-RT-F       | CGAGCAATTTGCCAAGCTCCTGAA        | OCT4              | RT-PCR - stem cell marker   |
| hOCT4-RT-F       | TCGGGCACTGCAGGAACAAATTC         |                   |                             |
| hRPE65-RT-F      | CAATGGGTTTCTGATTGTGGA           | RPE65             | RT-PCR – RPE marker         |
| hRPE65-RT-R      | GGGTGAGAAACAAAGATGGG            |                   |                             |
| hITGB8-RT-F      | ATCCTGTGCCAGGTGCCTT             | ITGB8             | RT-PCR – RPE marker         |
| hITGB8-RT-R      | TGGACGCAGCTGGATAGACAC           |                   |                             |
| hBEST1-RT-F      | CCTGCTGAACGAGATGAACA            | BEST1             | RT-PCR – RPE marker         |
| hBEST1-RT-R      | GGACACCTGCAAATTCCTGT            |                   |                             |
| hRLBP1-RT-F      | ACAAGTATGGCCGAGTGGTC            | RLBP1             | RT-PCR – RPE marker         |
| hRLBP1-RT-R      | CCACATTGTAGGTCGTGGTG            |                   |                             |
| VTN_ Ex3F        | AAGAACGGTTCCTCTTTGC             | VTN – cDNA        | RT-PCR – VTN                |
| hVTN_ Ex7-R      | GACACTCTGGATGGGTTACAG           |                   |                             |
| hVTN_ Ex7-F      | GGCCGCATCTACATCTCAGG            | VTN – genomic DNA | PCR with genomic DNA – VTN  |
| hVTN_ Ex7-R      | GACACTCTGGATGGGTTACAG           |                   |                             |
| hVTN_ Ex7-R      | GACACTCTGGATGGGTTACAG           | VTN               | sequencing                  |
| GFP-BamHI-F      | GGATCCATGGTGAGCAAGGGCGAGGA      | GFP               | Cloning of pcDNA3.1_GFP     |
| GFP-NotI-R       | TGGACGAGCTGTACAAGTAAAGCGGC CGC  |                   |                             |
| VTN-BamHI-F      | GGATCCATGGCACCCCTGAGACCCCT TCTC | VTN               | Cloning of pEXPR-IBA103_VTN |
| VTN-XhoIwostop-R | CTCGAGCAGATGGCCAGGAGCTGGG CA    |                   |                             |
| VTN-BamHI-F      | GGATCCATGGCACCCCTGAGACCCCT TCTC | VTN               | Cloning of pcDNA3.1_VTN     |
| VTN-XhoI-R       | CTCGAGCTACAGATGGCCAGGAGCTG GGCA |                   |                             |

Table S2: Antibodies, dilution, application and origin.

| <b>Antibodies</b>                                     | <b>Dilution</b> | <b>Application</b> | <b>Manufacturer (Country)</b>                         |
|-------------------------------------------------------|-----------------|--------------------|-------------------------------------------------------|
| $\alpha$ -ACTB<br>(A5441)                             | 1:10000         | WB                 | Sigma-Aldrich, St. Louis, MO, USA                     |
| $\alpha$ -ATP1A1<br>(55187-1-AP)                      | 1:100           | ICC                | Proteintech Group, Rosemont, IL, USA                  |
| $\alpha$ -ATP1B1<br>(15192-1-AP)                      | 1:100           | ICC                | Proteintech Group, Rosemont, IL, USA                  |
| $\alpha$ -BEST1<br>(ab2182)                           | 1:500           | ICC                | Abcam, Cambridge, United Kingdom                      |
| $\alpha$ -COL VI<br>(SD83-03)                         | 1:1000<br>1:100 | WB<br>IF           | ThermoFisher Scientific, Waltham, MA, USA             |
| $\alpha$ -ELA<br>(324756)                             | 1:200<br>1:100  | WB<br>IF           | (Calbiochem) Merck Chemicals GmbH, Darmstadt, Germany |
| $\alpha$ -FN<br>(F7387)                               | 1:800<br>1:100  | WB<br>IF           | Sigma-Aldrich, St. Louis, MO, USA                     |
| $\alpha$ -GFP<br>(sc-8334)                            | 1:10000         | WB                 | Santa Cruz Biotechnology, Dallas, TX, USA             |
| $\alpha$ -LAM<br>(ab11575)                            | 1:1000<br>1:100 | WB<br>IF           | BIOZOL Diagnostica Vertrieb GmbH, Eching, Germany     |
| $\alpha$ -VTN<br>(MAB2349)                            | 1:5000<br>1:250 | WB<br>IF           | R&D Systems, Inc., Minneapolis, MN, USA               |
| $\alpha$ -ZO1<br>(61-7300)                            | 1:500           | ICC                | Invitrogen by Life Technologies, Darmstadt, Germany   |
| Goat Anti-Mouse IgG,<br>Peroxidase conjugated         | 1:10000         | WB                 | (Calbiochem) Merck Chemicals GmbH, Darmstadt, Germany |
| Goat Anti-Rabbit IgG,<br>Peroxidase conjugated        | 1:10000         | WB                 | (Calbiochem) Merck Chemicals GmbH, Darmstadt, Germany |
| Goat Anti-Mouse IgG,<br>Alexa Fluor ® 594 conjugated  | 1:800           | IF/ICC             | ThermoFisher Scientific, Waltham, MA, USA             |
| Goat Anti-Rabbit IgG,<br>Alexa Fluor ® 488 conjugated | 1:800           | IF/ICC             | ThermoFisher Scientific, Waltham, MA, USA             |

WB = Western Blot, IF = Immunofluorescence, ICC = Immunocytochemistry
